# Supplementary material for: A transitional species of Daspletosaurus Russell, 1970 from the Judith River Formation of eastern Montana
Source: PeerJ. 2022 Nov 25;10:e14461. doi: 10.7717/peerj.14461 (PMC9703990; doi:10.7717/peerj.14461)
Supplement: Supplemental Information 2 [file peerj-10-14461-s002.xlsx]

## Sheet: tyrantdataset
	256 int 2: zone ossif	257 dntn 1: pmx msl crna	258 dntn 2: pmx #4	259 dntn 3: ling ridge	260 dntn 4: crvtr	261 dntn 5: mx teeth #	262 dntn 6: mx tooth crn	263 dntn 7: dn tooth #	264 dntn 8: tooth form	265 dntn 9: denticle sizes	266 cervs 1: cntrm l ratio	267 cervs 2: pn for dv psn	268 cervs 3: pn for fossa	269 cervs 4: ridge	270 cervs 5: for fo ridge	271 cervs 6: sp pr txtr	272 cervs 7: sp pr extnsns	273 axis 8: sp pr form	274 cervs 9: spdp fo	275 cervs 10: epi form	276 cervs 11: epi B	277 cervs 12: sp pr shape	278 cervs 13: sp pr height	279 cervs 14: cntr lmn	280 cervs 15: hypapoph	281 cervs 16: przygs	282 cervs 17: cntrd lmna ortn	283 dors 1: sp pr scars	284 dors 2: pneumaticity	285 dors 3: sp pr term	286 dors 4: centra l	287 dors 5: postzyg	288 dors 6: ctro lam	289 sacr 1: pn for	290 sacr 2: sp pr fen	291 sacr 3: ribs span	292 sacr 4: rib posn	293 sacr 5: #5	294 sacr 6: hypo	295 cdls 1: sp pr posn	296 cdls 2: trans pr shape	297 cdls 3: laminae	298 scap 1: angle	299 scap 2: acrom	300 scap 3: ratio A	301 scap 4: ratio B	302 scap 5: glnd	303 cor 1: lgth	304 cor 2: for
Allosaurus	0	0	0	0	0	0	0	0	0	0	0	1	0	0	0	0	0	1	0	1	1	0	0	0	0	0	0	2	0	0	1	0	0	0	0&1	0	0	0	0	1	0	0	0	0	0	0	0	0	0
Maniraptora	0	0	0	0	0	0&1	0	0	0	1	0	0	0	0	0	0	0&1	0	0	0&1	1	0	0	0	0	1	?	1	1	1	1	0	0	0&1	1	0	0	0	?	0	0	0	0	0	0	0	0	0	0
Ornithomimosauria	?	0	0	0	0	0	?	1	0	?	0	0	0	?	0	0	?	0	0	0	0	0	0	0	0	0	0	0	0	0	0	1	0	0	1&2	0	0	0	0	0	0	0	0	0	0	0	0	0	0
Compsognathus	?	0	0	0	0	0&1	0	0&1	0	?	0	?	?	?	?	?	?	0	?	0	?	0	0	0	0	?	?	0	0	0	0	0	?	0	0	0	?	0	?	0	?	?	0	0	0	0	0	1	0
Proceratosaurus	?	1	1	1	0	0	0	1	0	1	?	?	?	?	?	?	?	?	?	?	?	?	?	?	?	?	?	?	?	?	?	?	?	?	?	?	?	?	?	?	?	?	?	?	?	?	?	?	?
Kileskus	?	?	?	?	?	0	?	?	0	?	?	?	?	?	?	?	?	?	?	?	?	?	?	?	?	?	?	?	?	?	?	?	?	?	?	?	?	?	?	?	?	?	?	?	?	?	?	?	?
Sinotyrannus	?	?	?	?	?	?	0	?	0	1	?	?	?	?	?	?	?	?	?	?	?	?	?	?	?	?	?	?	?	?	?	?	?	?	?	?	?	?	?	?	?	?	?	?	?	?	?	?	?
Yutyrannus	?	1	1	?	0	0	0	0	0	?	0	0	0	?	0	0	?	?	0	1	?	0	1	0	0	?	?	?	0	0	1	0	0	?	1	?	?	?	?	1	0	0	0	0	0	0	0	0	0
Guanlong	?	1	0	1	0	1	0	?	0	1	0	?	?	?	?	?	?	?	?	0	0	0	0	0	0	0	1	0	0	0	0	0	1	0	1	0	0	0	0	?	0	?	0	0	0	0	0	0	1
Dilong	?	1	0	1	0	1	0	0	0	1	0	0	0	0	0	0	1	0	0	0	0	0	0	0	0	0	1	0	0	0	0	0	0	?	?	?	?	?	?	?	?	0	0	0	0	0	0	1	1
Eotyrannus	?	2	?	2	?	?	0	?	0	1	0	?	?	?	0	0	?	0	?	0	?	?	?	0	0	?	?	?	1	?	0	?	?	?	?	?	?	?	?	?	?	?	0	0	?	?	?	0	1
Juratyrant	?	?	?	?	?	?	?	?	?	?	0	?	?	?	?	?	?	?	?	0	0	0	?	0	0	?	1	0	0	0	0	1	0	0	?	0	0	1	0	0	?	0	?	?	?	?	?	?	?
Stokesosaurus	?	?	?	?	?	?	?	?	?	?	?	?	?	?	?	?	?	?	?	?	?	?	?	?	?	?	?	?	?	?	?	?	?	?	?	?	?	?	?	?	?	?	?	?	?	?	?	?	?
Aviatyrannis	?	?	?	?	?	?	?	?	?	?	?	?	?	?	?	?	?	?	?	?	?	?	?	?	?	?	?	?	?	?	?	?	?	?	?	?	?	?	?	?	?	?	?	?	?	?	?	?	?
Timurlengia	?	2	?	2		0	?	?	1	?	0	?	?		?		?	?	?	?	?	?			?	?	?	0	0	0	1	1	?	?	?	?	?	?	?	?	?	?	?	?	?	?	?	?	?
Xiongguanlong	?	2	?	2	?	0	1	?	0	?	0	?	?	0	0	0	0	1	0	0	1	0	0	0	1	1	0	0	0	0	0	1	0	?	?	?	?	?	?	?	?	?	?	?	?	?	?	?	?
Dryptosaurus	?	?	?	?	?	?	1	?	0	0	?	?	?	?	?	?	?	?	?	?	?	?	?	?	?	?	?	?	?	?	?	?	?	?	?	?	?	?	?	?	?	?	?	?	?	?	?	?	?
Appalachiosaurus	?	2	?	2	?	0	?	0	?	?	?	?	?	?	?	?	?	?	?	?	?	?	?	?	?	?	?	?	?	?	?	?	?	?	?	?	?	?	?	?	0	?	?	?	?	?	?	?	?
Bistahieversor	?	2	?	2	?	0	1	0	0	?	?	?	?	?	1	1	1	?	?	?	?	?	?	?	?	?	?	?	?	?	?	?	?	?	?	?	?	?	?	?	0	1	1	1	1	1	1	?	?
Albertosaurus	?	2	1	2	1	0	1	0	1	0	1	?	?	?	?	?	?	1	?	0	1	1	1	?	?	?	?	1	1	1	0	1	?	?	?	?	?	1	?	0	?	?	1	1	1	1	1	1	0
Gorgosaurus	?	2	1	2	1	0	?	0	1	0	1	?	?	?	?	?	?	1	?	?	?	1	1	?	?	?	?	?	?	?	?	1	?	?	?	?	?	?	?	?	?	0	1	1	1	1	1	1	0
Lythronax	?	?	?	?	?	1	?	0	?	?	?	?	?	?	?	?	?	?	?	?	?	?	?	?	?	?	?	?	?	?	?	?	?	?	?	?	?	?	?	?	?	1	?	?	?	?	?	?	?
Alioramus remotus	?	?	?	?	?	0	?	1	?	?	?	?	?	?	?	?	?	?	?	?	?	?	?	?	?	?	?	?	?	?	?	?	?	?	?	?	?	?	?	?	?	?	?	?	?	?	?	?	?
Alioramus altai	0	?	?	?	?	0	?	1	0	0	0	0	0	1	0	0	0	1	0	0	0	1	1	1	1	1	0		1	1	0	1	1	?	2	1	0	1	1	1	1	1	?	?	?	?	?	?	?
Qianzhousaurus	0	?	?	?	?	0	?	1	1	?	0	1	0	1	1	?	?	1	0	0	?	1	1	1	?	1	0	2	?	1	0	1	1	?	?	?	?	?	?	1	1	1	1	1	1	?	1	1	0
Teratophoneus	?	?	?	?	?	1	1	0	0	0	?	?	?	?	?	?	?	?	?	1	1	?	1	1	?	1	0	2	?	?	?	?	?	?	?	?	?	?	?	1	1	1	?	?	?	?	1	?	0
Nanuqsaurus	?	?	?	?	?	?	?	?	?	?	?	?	?	?	?	?	?	?	?	?	?	?	?	?	?	?	?	?	?	?	?	?	?	?	?	?	?	?	?	?	?	?	?	?	?	?	?	?	?
Dynamoterror	?	?	?	?	?	?	?	?	?	?	?	?	?	?	?	?	?	?	?	?	?	?	?	?	?	?	?	?	?	?	?	?	?	?	?	?	?	?	?	?	?	?	?	?	?	?	?	?	?
Daspletosaurus torosus	0	2	1	2	1	0	1	0	1	0	1	0	0	0	1	1	1	1	0	1	1	1	1	1	1	1	0	2	1	1	1	1	0	?	?	?	?	?	?	1	?	1	1	1	1	1	1	1	?
Daspletosaurus horneri	?	2	?	2	1	0	1	0	1	0	1	1	1	1	?	?	?	?	?	0	1	?	1	1	?	1	0	2	1	1	1	1	0	?	?	?	?	?	?	?	1	1	?	?	?	?	?	?	?
Iren Dabasu taxon	?	2	?	2	?	?	?	?	1	0	?	?	?	?	?	?	?	?	?	?	?	?	?	?	?	?	?	?	?	?	?	?	?		?	?	?	?	?	?	?	?	?	?	?	?	?	?	?
Zhuchengtyrannus	?	?	?	?	?	1	1	0	1	0	?	?	?	?	?	?	?	?	?	?	?	?	?	?	?	?	?	?	?	?	?	?	?	?	?	?	?	?	?	?	?	?	?	?	?	?	?	?	?
Tarbosaurus	1	2	1	2	1	1	1	0	2	0	1	1	1	1	1	1	?	1	1	1	1	1	1	1	?	1	0	2	1	1	1	1	1	1	?	?	1	?	?	1	?	1	1	1	1	1	1	1	0
Tyrannosaurus	1	2	1	2	1	1	1	0	2	0	1	1	1	1	1	1	0	1	1	1	1	1	1	1	1	1	0	2	1	1	1	1	0	1	2	1	1	1	1	1	1	1	1	1	1	1	1	1	0
Thanatotheristes	?	?	?	?	?	0	1	?	1	0	?	?	?	?	?	?	?	?	?	?	?	?	?	?	?	?	?	?	?	?	?	?	?	?	?	?	?	?	?	?	?	?	?	?	?	?	?	?	?
Daspletosaurus wilsoni	?	2	?	?	1	0	?	0	1	0	1	?	?	?	?	?	?	?	?	?	1	1	1	1	1	1	0	?	?	?	?	?	?	?	2	?	?	?	?	?	?	?	?	?	?	?	?	?	?
[truncated: 99 more columns]

## Sheet: tyrantdataset.xlsx
	1 general 1: body size	2 skull 1: occ ornt	3 skull 2: gen shape	4 skull 3: length	5 skull 4: naris length	6 skull 5: naris, cdl mrgn	7 skull 6: orb fen shape	8 skull 7: orb fen size	9 skull 8: orb fen orntn	10 skull 9: ltfen	11 pmx 1: na prs	12 pmx 2: na fos for	13 pmx 3: body d	14 pmx 4: mx pr	15 pmx 5: tooth row	16 pmx 6: na fos excav	17 pmx 7: na fo extent	18 pmx 8: rstrl mrgn	19 pmx 9: ptl pr	20 mx 1: promax fen exp	21 mx 2: promax fen posn	22 mx 3: max fen rc posn	23 mx 4: max fen dv posn	24 mx 5: max fen rc length	25 mx 6 NEW: max juve size	26 mx 7: max fen prpns	27 mx 8: max fen dv psn mx antrm	28 mx 9: max fen, cdl mrgn, shape	29 mx 10: 2ndry fossa, presence	30 mx 11: aofo & na	31 mx 12: intfn strut length	32 mx 13: intfen strt base	33 mx 14 NEW: interfen strut top	34 mx 15: main body	35 mx 16: aofo depth	36 mx 17:subcut flange	37 mx 18: drsltrl pr	38 mx 19: aofo rostral lap	39 mx 20: ventral margin	40 mx 21: js pal	41 mx 22: rostral ramus step	42 mx 23: js nasal	43 mx 24: subcut texture	44 mx 25 NEW: ext surf B	45 mx 26: rim below aofo	46 mx 27: asc ramus size	47 mx 28: body cdl rgn	48 mx 29: mx flange	49 mx 30: foramina
Allosaurus	1	0	1	0	0	0	2	1	0	0	0	0	0	0	0	0	0	0	1	0	1	0	0	0	0	0	0	0	0	0	0	0	0	1	0	0	0	0	0	0	1	0	0	0	0	1	1	0	0
Maniraptora	0&1	0	0	0	0	0	0	0	0	0	?	0	0	0	0	0	0	0&1	0	0	0	0	0	0	0	0	?	0	0	0	0	0	0	1	0	0	?	0	0	?	0	0	0	0	1	1	1	0	0
Ornithomimosauria	0&1	0	0	0	0	0	0	0	0	0	0	1	0	0	0	0	0	0	?	0	0	0	0	0	?	1	?	0	0	0	0	0	0	0	0	0	?	0	0	?	0	0	0	0	1	0	0	0	0
Compsognathus	0	?	0	0	0	1	0	0	0	0	0	0	0	0	0	0	0	0	0	0	0	0	0	0	1	0	?	0	0	0	0	0	0	1	0	0	?	0	0	?	0	?	0	0	0	0	0	0	?
Proceratosaurus	0	0	0	?	1	2	0	0	0	0	0	1	1	0	1	1	1	2	?	0	1	0	0	0	?	0	?	0	0	1	0	0	0	1	0	0	?	0	0	?	1	?	0	0	0	0	0	0	1
Kileskus	0	?	?	?	1	2	?	?	?	?	?	1	1	0	1	1	1	2	0	0	1	0	0	?	?	0	?	0	0	?	0	0	0	?	0	0	?	0	0	0	0	?	0	?	0	0	0	?	?
Sinotyrannus	0	?	?	?	1	2	?	?	?	?	?	?	1	0	?	1	?	1	?	1	1	1	0	?	?	0	?	0	?	?	0	0	?	?	?	?	?	0	?	?	1	?	0	?	0	?	?	?	?
Yutyrannus	1	0	1	0	1	2	2	1		1	0	1	1	0	1	1	1	1	?	1	1	0	0	2	?	0	?	0	0	0	0	0	0	1	0	0	?	?	1	?	1	?	0	?	0	0	0	0	1
Guanlong	0	0	0	0	1	2	?	0	0	0	0	0	1	0	1	1	1	2	0	0	1	0	0	0	?	0	?	0	0	1	0	0	?	1	0	0	?	0	0	?	1	0	0	0	0	0	0	?	1
Dilong	0	0	0	0	0	2	0	0	0	0	0	1	1	0	1	0	0	2	?	0	1	0	0	1	?	0	?	0	0	1	0	0	0	0	0	0	1	0	0	?	1	?	0	0	0	0	0	0	0
Eotyrannus	0	?	?	?	0	?	?	?	?	?	?	1	1	?	1	0	0	1	0	1	1	1	0	?	?	?	?	?	?	?	?	?	?	?	?	?	?	0	0	?	0	?	0	?	1	?	?	?	?
Juratyrant	0	?	?	?	?	?	?	?	?	?	?	?	?	?	?	?	?	?	?	?	?	?	?	?	?	?	?	?	?	?	?	?	?	?	?	?	?	?	?	?	?	?	?	?	?	?	?	?	?
Stokesosaurus	0	?	?	?	?	?	?	?	?	?	?	?	?	?	?	?	?	?	?	?	?	?	?	?	?	?	?	?	?	?	?	?	?	?	?	?	?	?	?	?	?	?	?	?	?	?	?	?	?
Aviatyrannis	0	?	?	?	?	?	?	?	?	?	?	?	?	?	?	?	?	?	?	?	?	?	?	?	?	?	?	?	?	?	?	?	?	?	?	?	?	?	?	?	?	?	?	?	?	?	?	?	?
Timurlengia	0	0	?	?	?	?	?	?	?	?	?	?	?	?	?	?	?	?	?	0	0	?	0	1	?	?	?	?	?	?	1	0	?	?	1	0	?	?	1	?	0	?	0	0	1	?	1	?	0
Xiongguanlong	0	0	0	1	0	0	0	0	0	0	?	1	1	0	2	0	0	1	?	?	?	?	0	?	?	0	?	?	?	1	?	0	?	?	0	0	?	0	1	?	0	?	0	0	1	?	0	?	0
Dryptosaurus	1	?	?	?	?	?	?	?	?	?	?	?	?	?	?	?	?	?	?	?	?	?	?	?	?	?	?	?	?	?	?	?	?	?	?	?	?	?	?	?	?	?	0	0	?	?	?	?	?
Appalachiosaurus	1	?	?	1	?	0	?	?	?	?	?	?	?	?	?	?	?	?	?	0	0	0	0	0	1	0	0	1	?	?	0	0	0	1	0	0	?	0	1	?	0	1	0	0	1	1	1	1	?
Bistahieversor	1	?	0	?	0	0	1	1	0	1	0	1	1	1	2	0	0	1	1	0	0	0	0	0	1	0	?	1	0	1	0	0	0	2	1	0	1	0	1	?	0	1	0	0	1	1	1	1	0
Albertosaurus	1	0	1	1	0	0	1	1	0	1	0	1	1	1	2	0	0	1	1	0	0	0	0	0	1	0	0	1	1	0&1	1	0	0	2	0	0	1	0&1	1	0	0	1	0	0	1	1	1	1	0
Gorgosaurus	1	0	1	1	0	0	1	1	0	1	0	1	1	1	2	0	0	1	?	0	0	0	0	0	1	0	0	1	0	0&1	1	0	0	2	0	0	1	0	1	0	0	1	0	0	1	1	1	1	0
Lythronax	1	?	?	?	?	0	?	?	?	1	?	?	?	?	?	?	?	?	?	0	0	0	0	0	?	0	0	1	0	?	0	0	?	?	1	0	?	0	1	1	0	1	0	0	1	?	1	1	0
Alioramus remotus	0	0	0	?	0	?	?	?	?	1	?	?	?	?	?	?	?	?	?	?	?	?	0	?	?	?	?	?	?	?	?	?	?	1	?	0	?	?	1	?	0	?	0	0	1	?	?	?	?
Alioramus altai	0	0	0	1	0	0	1	1	?	1	1	?	?	?	?	?	?	?	?	0	0	0	0	0	0	1	1	1	1	1	1	0	0	1	0	1	1	1	1	1	0	1	0	0	1	1	1	1	0
Qianzhousaurus	0	0	0	?	0	0	?	1	0	1	1	1	1	2	2	0	0	1	1	0	0	0	0	2	?	1	?	1	1	1	1	0	1	1	0	1	1	1	1	1	0	1	0	0	1	1	1	1	0
Teratophoneus	1	?	?	?	?	?	1	?	?	1	?	?	?	?	?	?	?	?	?	?	0	0	0	0	1	0	?	?	1	?	?	?	?	?	?	0	?	1	1	?	0	1	0	0	1	?	?	1	0
Nanuqsaurus	0	?	?	?	?	?	?	?	?	?	?	?	?	?	?	?	?	?	?	?	?	?	?	?	?	?	?	?	?	?	?	?	?	?	?	?	?	?	?	?	?	2	?	?	?	?	?	?	?
Dynamoterror	1	?	?	?	?	?	?	?	?	?	?	?	?	?	?	?	?	?	?	?	?	?	?	?	?	?	?	?	?	?	?	?	?	?	?	?	?	?	?	?	?	?	?	?	?	?	?	?	?
Daspletosaurus torosus	1	1	1	1	0	0	1	1	0	1	0	1	1	2	2	0	0	1	1	1	0	0	0	2	0	0	0	1	1	1	1	0	1	2	0	0	2	1	1	1	0	2	2	0	1	1	1	1	0
Daspletosaurus horneri	1	1	1	?	0	0	2	1	1	1	0	1	?	2	?	0	0	?	?	1	0	0	1	2	0	0	0	1	1	1	0&1	0	1	2	0	0	2	0	1	1	0	2	2	0	1	1	1	1	0
Iren Dabasu taxon	0	?	?	?	?	?	?	?	?	?	?	?	?	?	?	?	?	?	?	?	?	?	?	?	?	?	?	?	?	?	?	?	?	?	?	?	?	?	?	?	?	?	?	?	?	?	?	?	?
Zhuchengtyrannus	1	?	?	?	?	?	?	?	?	?	?	?	?	?	?	?	?	?	?	1	0	1	0	?	?	0	?	?	?	?	?	1	?	?	0	0	?	?	1	1	0	?	1	2	1	?	1	?	0
Tarbosaurus	1	1	1	1	0	0	2	1	1	1	1	1	2	2	2	0	0	1	1	1	0	1	1	2	0	0	1	1	1	0	1	1	1	2	1	1	3	0	1	1	0	2	1	2	1	1	1	1	0
Tyrannosaurus	1	1	1	1	0	0	2	1	1	1	1	1	2	2	2	0	0	1	1	1	0	1	1	2	1	0	1	1	1	0	1	1	1	2	0&1	0	1&3	0	1	1	0	2	1	2	1	1	1	1	0
Thanatotheristes	1	?	?	?	?	?	?	?	?	?	?	?	?	?	?	?	?	?	?	1	0	0	0	?	?	?	?	?	?	?	?	?	?	?	?	0	?	?	1	?	?	?	2	1	1	?	1	?	0
Daspletosaurus wilsoni	1	?	1	?	?	?	2	1	0	1	0	1	1	2	2	0	0	1	1	1	0	0	0	2	?	0	0	1	1	1	1	0	?	2	0	0	?	0	1	1	0	2	2	0	1	1	1	1	0
																				short promaxillary interfenestral strut																						Subcutaneous texture of Lythronax closely matches texturing of large Gorgosaurus and Albertosaurus	prominent ridges are present in Thanatotheristes but unique from those of Tyrannosaurus-Zhuchengtyrannus morphology			47/48 switched
[truncated: 206 more columns]
